# Supplementary material
Source: publisher figshare collection journal article supplement (https://karger.figshare.com/ndownloader/files/12833732)
Supplement: Supplementary file 1 [file 12833732]

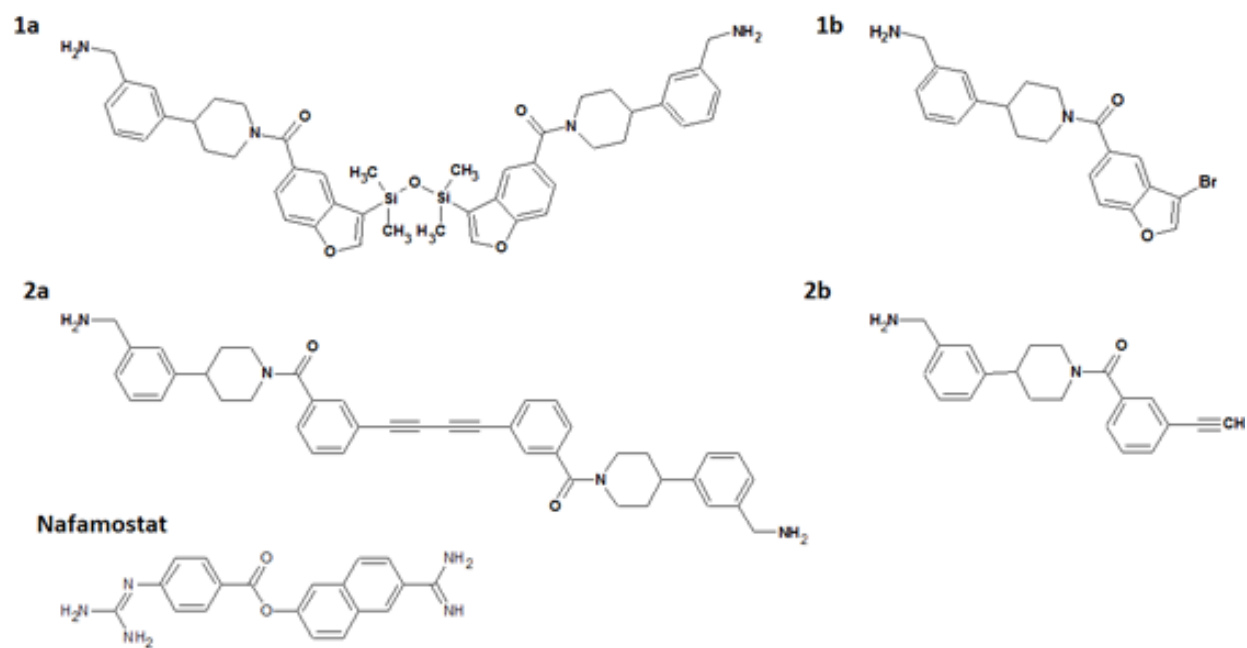

**Figure S1:**  $\beta$ -tryptase inhibitors used in the current study.

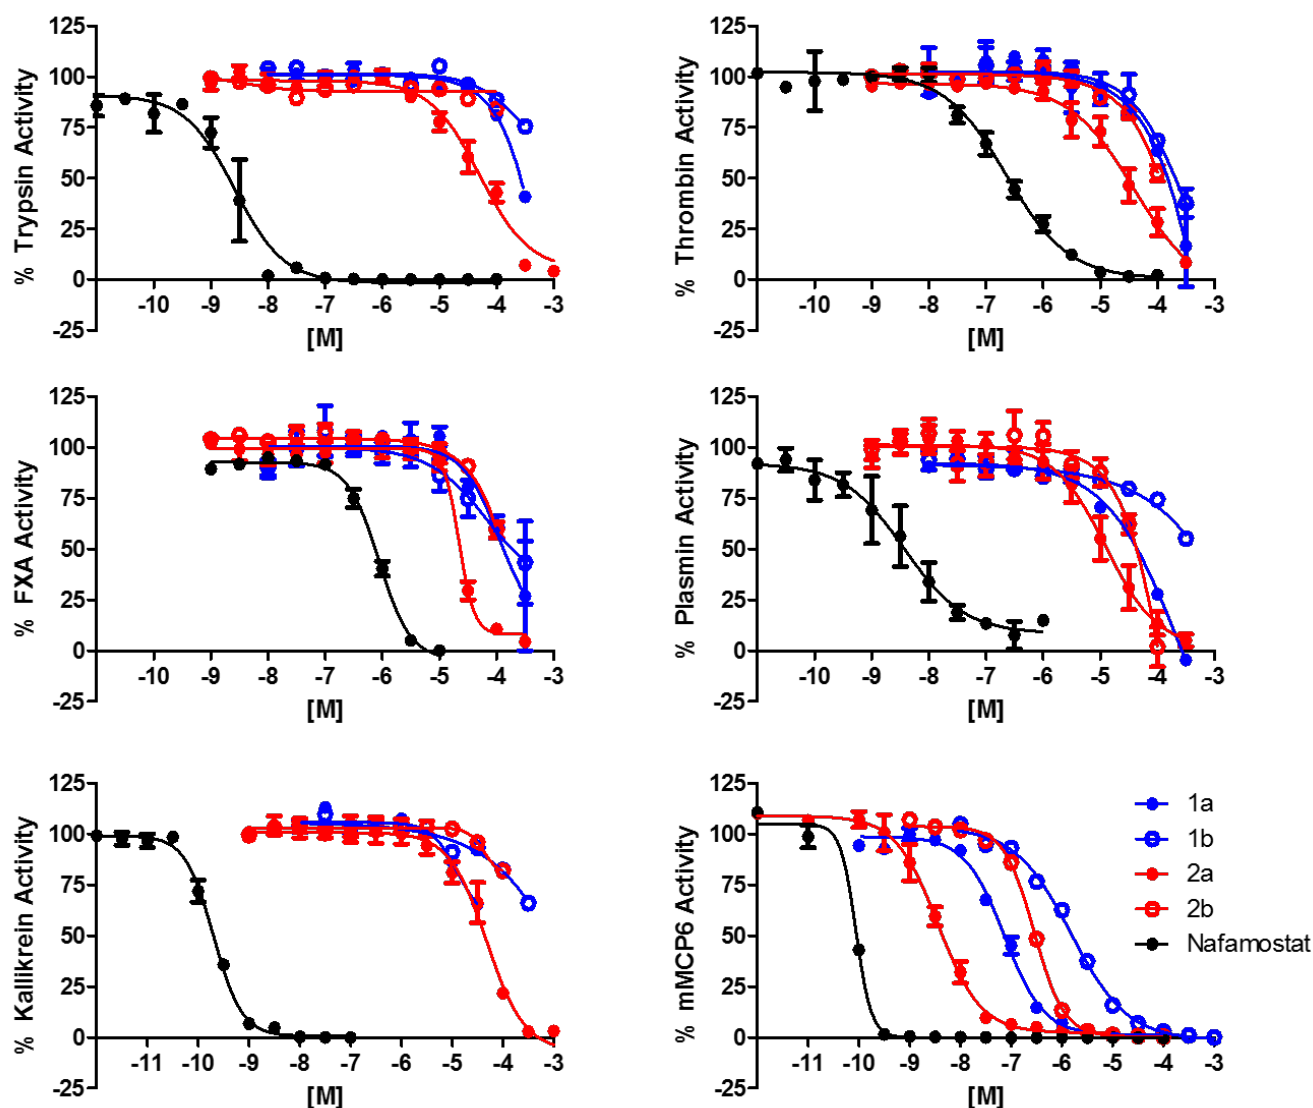

| IC50 [M] |                  |      |                 |                  |      |                 |                  |      |                 |                  |      |                 |                  |      |                 |                  |
|----------|------------------|------|-----------------|------------------|------|-----------------|------------------|------|-----------------|------------------|------|-----------------|------------------|------|-----------------|------------------|
|          | TRYPSIN          |      |                 | THROMBIN         |      |                 | FXA              |      |                 | PLASMIN          |      |                 | KALLIKREIN       |      |                 | TRYPTASE         |
|          | IC <sub>50</sub> | SEM  | fold difference | IC <sub>50</sub> |
| 1a       | 2.74E-03         | 0.55 | 636935.26       | >100uM           |      | 619003.26       | 1.13E-04         | 0.38 | 26315.79        | 2.41E-04         | 0.39 | 56194.69        | 1.28E-05         | 0.26 | 2971.59         | 4.294E-09        |
| 1b       | 3.14E-04         | 0.29 | 705.12          | 2.71E-04         | 0.97 | 607.72          | 6.82E-05         | 0.70 | 153.10          | >100uM           |      |                 | >100uM           |      |                 | 4.456E-07        |
| 2a       | 5.10E-05         | 0.10 | 20539.89        | 3.97E-05         | 0.34 | 15995.17        | 2.21E-05         | 0.04 | 8887.99         | 1.24E-05         | 0.19 | 4979.85         | 4.83E-05         | 0.11 | 19452.05        | 2.482E-09        |
| 2b       | 3.39E-09         | 0.84 | 0.01            | >100uM           |      | 14992.68        | >100uM           |      |                 | 3.04E-04         | 2.66 | 889.54          | 4.17E-05         | 0.51 | 122.12          | 3.413E-07        |
| naf      | 2.62E-09         | 0.13 | 5.67            | 2.30E-07         | 0.06 | 498.16          | 8.77E-07         | 0.04 | 1899.67         | 3.69E-09         | 0.20 | 8.00            | 2.01E-10         | 0.03 | 0.43            | 4.615E-10        |

**Figure S2:** Selectivity of  $\beta$ -tryptase inhibitors over closely related proteases and the murine homolog, mMCP6. Apparent IC<sub>50</sub>s for compounds 1a, 1b, 2a, 2b and nafamostat with select serine proteases assayed at 1nM. Fold-selectivity for tryptase is indicated.

|                                                                      |                        |
|----------------------------------------------------------------------|------------------------|
|                                                                      | <b>1a</b>              |
| <b>PDB ID</b>                                                        | 4MPW                   |
| <b>Cell dimensions <math>a=b</math>, <math>c</math> (Å)</b>          | 78.462,<br>165.620     |
| <b>Resolution (Å)<sup>†</sup></b>                                    | 30-1.95<br>(2.02-1.95) |
| <b><math>R_{\text{sym}}^{\ddagger}</math></b>                        | 0.088 (0.439)          |
| <b>Average <math>I/\sigma I</math></b>                               | 21.4 (3.5)             |
| <b>Completeness (%)</b>                                              | 100 (100)              |
| <b>Redundancy</b>                                                    | 5.4 (5.5)              |
| <b>Resolution (Å)</b>                                                | 1.95                   |
| <b>No. reflections<sup>§</sup></b>                                   | 40961                  |
| <b><math>R_{\text{factor}}</math> , <math>R_{\text{free}}</math></b> | 0.164 (0.206)          |
| <b>Protein atoms</b>                                                 | 3828                   |
| <b>Water molecules</b>                                               | 421                    |
| <b>Compound atoms</b>                                                | 57                     |
| <b>rmsd bond lengths (Å)</b>                                         | 0.018                  |
| <b>rmsd bond angles (°)</b>                                          | 2.03                   |

**Table S1:** X-ray data collection and refinement statistics. <sup>†</sup>The highest resolution shells are shown in parentheses. <sup>‡</sup> $R_{\text{sym}} = \sum |I_i - \langle I \rangle| / \sum I_i$  where  $I_i$  is the intensity of a measurement and  $\langle I \rangle$  is the average intensity for that reflection. <sup>§</sup>Of these reflections, 5% are used for the  $R_{\text{free}}$  calculation.

| Component          | Fold IC <sub>50</sub> Shift<br>at 1nM<br>Tryptase |
|--------------------|---------------------------------------------------|
| 3% BSA             | 0.55                                              |
| 5% BSA             | 0.49                                              |
| 1mg/ml αGP1        | 1.67                                              |
| 8mM Glucose        | 0.94                                              |
| 100μM Sorbitol     | 1.15                                              |
| 10mM L-Glutathione | 1.06                                              |
| 10% Human Plasma   | 1.57                                              |
| 20% Human Plasma   | 2.56                                              |
| 10% Mouse Plasma   | 3.52                                              |
| 20% Mouse Plasma   | 7.76                                              |

**Table S2:** Compound 1a IC<sub>50</sub> shifts in the presence of plasma components. Dose response curves and resultant IC<sub>50</sub>s were compared for shifts in potency against Bovine serum albumin (BSA), α1-glycoprotein (αGP1), glucose, sorbitol, L-glutathione and human and mouse plasma. To inhibit proteolytic activity of enzymes present in plasma, protease inhibitors demonstrating no inhibitory actions against tryptase, were added to the assay buffer. Ratios of the IC<sub>50</sub>s between no additives and additives are presented.
